# Supplementary material for: Evaluating the isomeric effects of donors on the structures and photophysical properties of donor–acceptor–π bridge–donor (D1–A–π–D2) prototype fluorophores
Source: Royal Society of Chemistry journal article supplement (doi:10.1039/d3nj01845h), 2023-01-01
Supplement: d3nj01845h1.pdf [file d3nj01845h1.pdf]

**Evaluating the isomeric effects of donors on the structures  
and photophysical properties of Donor-Acceptor- $\pi$   
Bridge-Donor (D1-A- $\pi$ -D2) prototype fluorophores**

Dong-En Wu and Qing-Hui Guo\*

School of Chemical Engineering & Pharmacy, Changzhou Vocational

Institute of Engineering, Changzhou 213164, P. R. China

Telephone number: 0519-86332045, Fax number: 0519-86332045,

Email: [gqhappy1986@126.com](mailto:gqhappy1986@126.com)

**Table S1.** Crystal data and structure refinements of four compounds.

| Compd                                                             | MNM                                                           | <i>p</i> -BMNM                                                | <i>o</i> -BMNM                                                | <i>m</i> -BMNM                                                |
|-------------------------------------------------------------------|---------------------------------------------------------------|---------------------------------------------------------------|---------------------------------------------------------------|---------------------------------------------------------------|
| Formula                                                           | C <sub>16</sub> H <sub>12</sub> N <sub>2</sub> O              | C <sub>29</sub> H <sub>20</sub> N <sub>2</sub> O              | C <sub>29</sub> H <sub>20</sub> N <sub>2</sub> O              | C <sub>29</sub> H <sub>20</sub> N <sub>2</sub> O              |
| Formula weight                                                    | 248.28                                                        | 412.47                                                        | 412.47                                                        | 412.47                                                        |
| Crystal system                                                    | Monoclinic                                                    | Monoclinic                                                    | Monoclinic                                                    | Monoclinic                                                    |
| Space group                                                       | P2 <sub>1</sub> /n                                            | P2 <sub>1</sub> /n                                            | P2 <sub>1</sub> /n                                            | P2 <sub>1</sub> /c                                            |
| <i>a</i> /Å                                                       | 11.021(6)                                                     | 4.1510(3)                                                     | 9.6109(5)                                                     | 25.2179(13)                                                   |
| <i>b</i> /Å                                                       | 7.962(4)                                                      | 32.660(2)                                                     | 10.0070(4)                                                    | 11.4889(6)                                                    |
| <i>c</i> /Å                                                       | 15.851(8)                                                     | 15.7551(13)                                                   | 23.2959(11)                                                   | 7.5967(4)                                                     |
| $\alpha$ /°                                                       | 90                                                            | 90                                                            | 90                                                            | 90                                                            |
| $\beta$ /°                                                        | 103.442(17)                                                   | 93.710(3)                                                     | 91.533(2)                                                     | 95.619(2)                                                     |
| $\gamma$ /°                                                       | 90                                                            | 90                                                            | 90                                                            | 90                                                            |
| V/Å <sup>3</sup>                                                  | 1352.8(11)                                                    | 2131.5(3)                                                     | 2239.71(18)                                                   | 2190.4(2)                                                     |
| Z                                                                 | 4                                                             | 4                                                             | 4                                                             | 4                                                             |
| D <sub>calc</sub> (Mg m <sup>-3</sup> )                           | 1.219                                                         | 1.285                                                         | 1.223                                                         | 1.251                                                         |
| T/K                                                               | 296(2)                                                        | 296(2)                                                        | 296(2)                                                        | 296(2)                                                        |
| $\mu$ (mm <sup>-1</sup> )                                         | 0.078                                                         | 0.078                                                         | 0.075                                                         | 0.076                                                         |
| Cryst dimensions                                                  | 0.210×0.170×0.150                                             | 0.280×0.220×0.120                                             | 0.230×0.230×0.170                                             | 0.250×0.190×0.160                                             |
| No. of felns collected                                            | 13108                                                         | 15413                                                         | 17698                                                         | 21542                                                         |
| No. of unique reflns                                              | 3095                                                          | 4884                                                          | 5072                                                          | 4947                                                          |
| Goodness-of-fit on F <sup>2</sup>                                 | 1.027                                                         | 1.005                                                         | 1.019                                                         | 1.005                                                         |
| <i>R</i> <sub>1</sub> , <i>wR</i> <sub>2</sub> (I>2 $\sigma$ (I)) | <i>R</i> <sub>1</sub> =0.0536, <i>wR</i> <sub>2</sub> =0.1379 | <i>R</i> <sub>1</sub> =0.0574, <i>wR</i> <sub>2</sub> =0.1219 | <i>R</i> <sub>1</sub> =0.0598, <i>wR</i> <sub>2</sub> =0.1270 | <i>R</i> <sub>1</sub> =0.0612, <i>wR</i> <sub>2</sub> =0.1099 |
| <i>R</i> <sub>1</sub> , <i>wR</i> <sub>2</sub> (all data)         | <i>R</i> <sub>1</sub> =0.0950, <i>wR</i> <sub>2</sub> =0.1586 | <i>R</i> <sub>1</sub> =0.1127, <i>wR</i> <sub>2</sub> =0.1450 | <i>R</i> <sub>1</sub> =0.1455, <i>wR</i> <sub>2</sub> =0.1531 | <i>R</i> <sub>1</sub> =0.1549, <i>wR</i> <sub>2</sub> =0.1352 |
| CCDC                                                              | 2232678                                                       | 2055960                                                       | 2232682                                                       | 2232679                                                       |

**Table S2** Summary of intermolecular interactions in crystal structures of four compounds

| Compd                | Interaction        | d(Å)               | A(°)   |
|----------------------|--------------------|--------------------|--------|
| <b>MNM</b>           | C5-H5...N1         | 2.675 <sup>a</sup> | 149.01 |
| <b><i>o</i>-BMNM</b> | C7-H7...N1         | 2.666 <sup>a</sup> | 136.44 |
|                      | C25-H25... $\pi_1$ | 2.766 <sup>b</sup> | 139.44 |
| <b><i>m</i>-BMNM</b> | C5-H5...O1         | 2.694 <sup>c</sup> | 139.68 |
|                      | C7-H7...O1         | 2.696 <sup>c</sup> | 155.45 |
| <b><i>p</i>-BMNM</b> | C16-H16...N2       | 2.747 <sup>a</sup> | 162.53 |
|                      | C19-H19...N1       | 2.666 <sup>a</sup> | 149.30 |
|                      | C25-H25... $\pi_1$ | 4.540 <sup>b</sup> | 165.25 |

<sup>a</sup>The distances were measured from the hydrogen atom to the nitrogen atom  
 $\pi_1$  corresponds to the 6-methoxynaphthalene moieties

<sup>b</sup>The distances were measured from the hydrogen atom to the center of 6-methoxynaphthalene moiety

<sup>c</sup>The distances were measured from the hydrogen atom to the oxygen atom

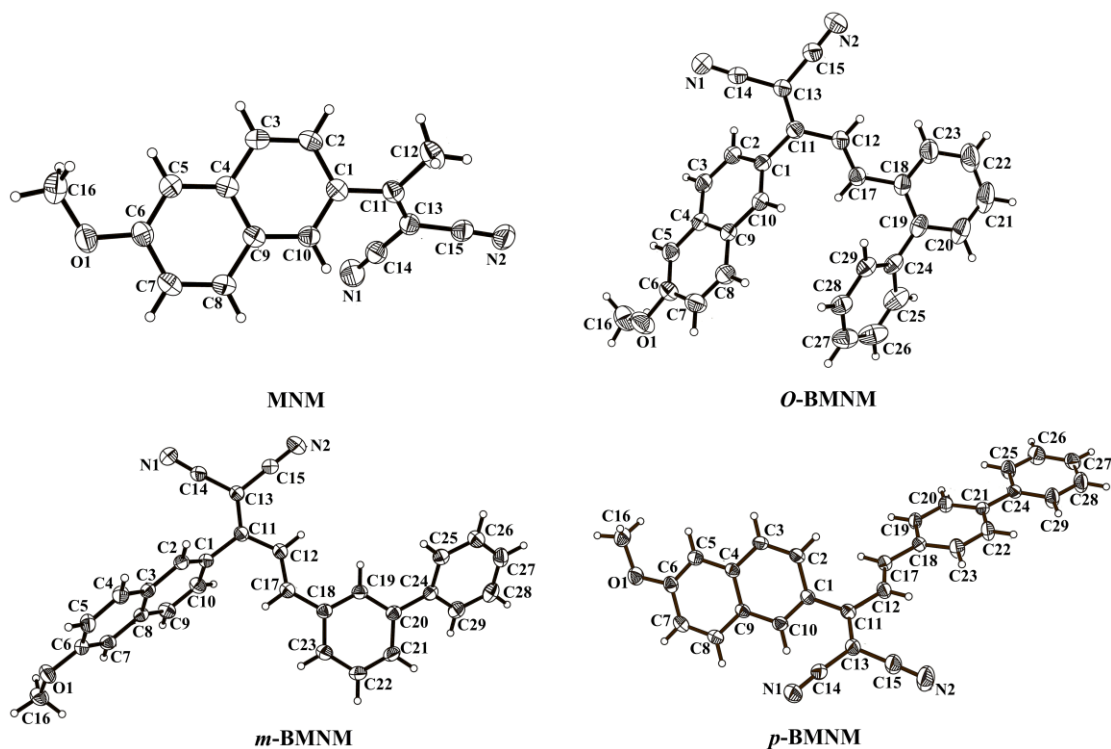

**Fig.S1** Perspective views of four compounds. Thermal ellipsoids were at 30% probability.

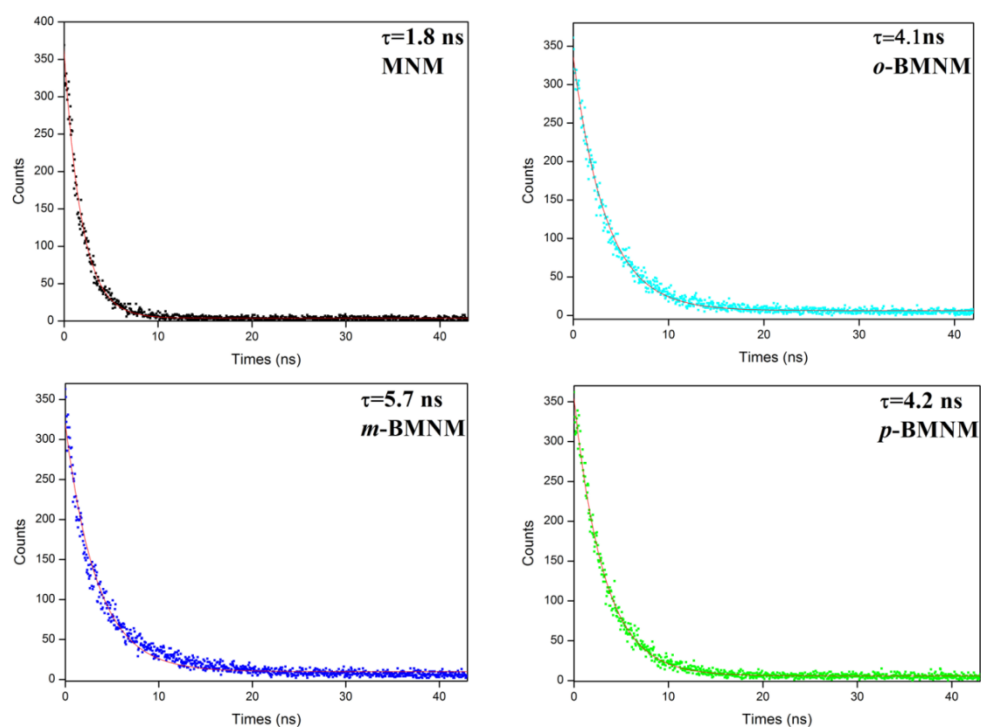

**Fig.S2** Fluorescence decay curves of four compounds (Fluorescence lifetimes were measured at 467 nm)

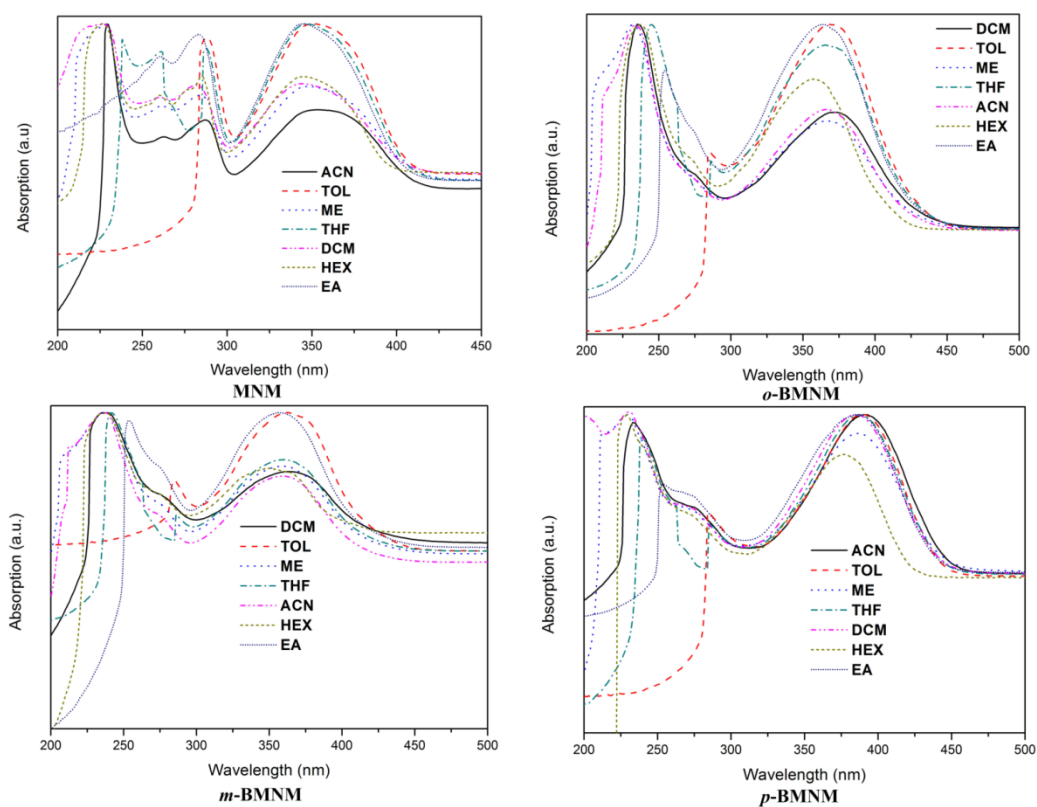

**Fig.S3** The normalized absorption spectrum of four compounds in different solvents (10  $\mu$  M).

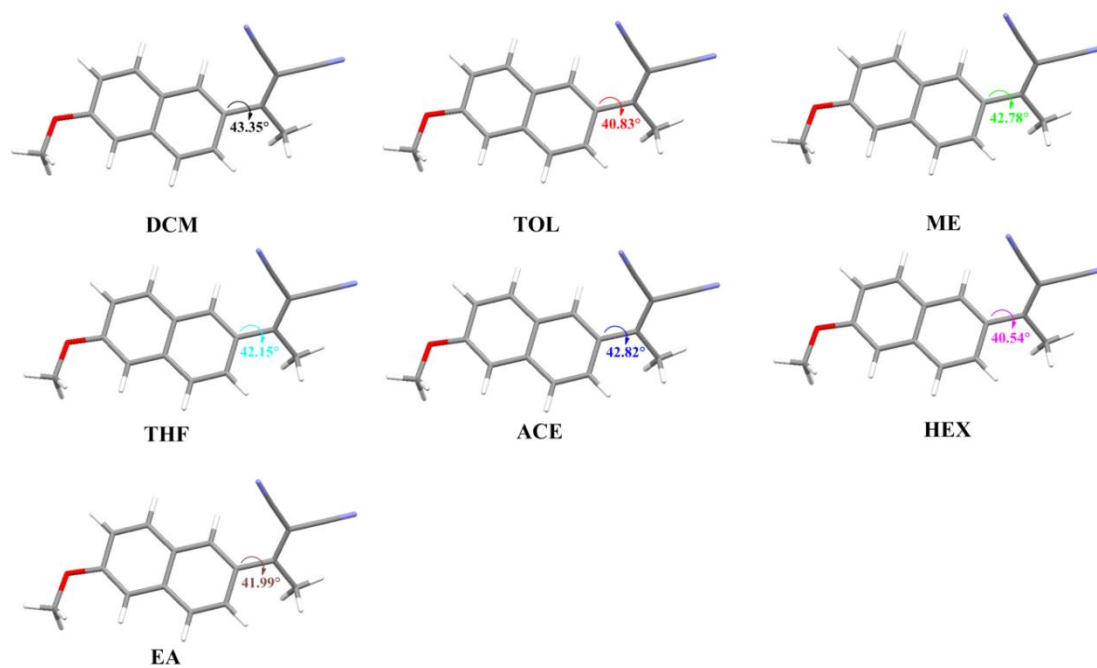

**Fig.S4** The selected dihedral angles ( $\theta/^\circ$ ) in optimized structures of ground state ( $S_0$ ) of MNM.

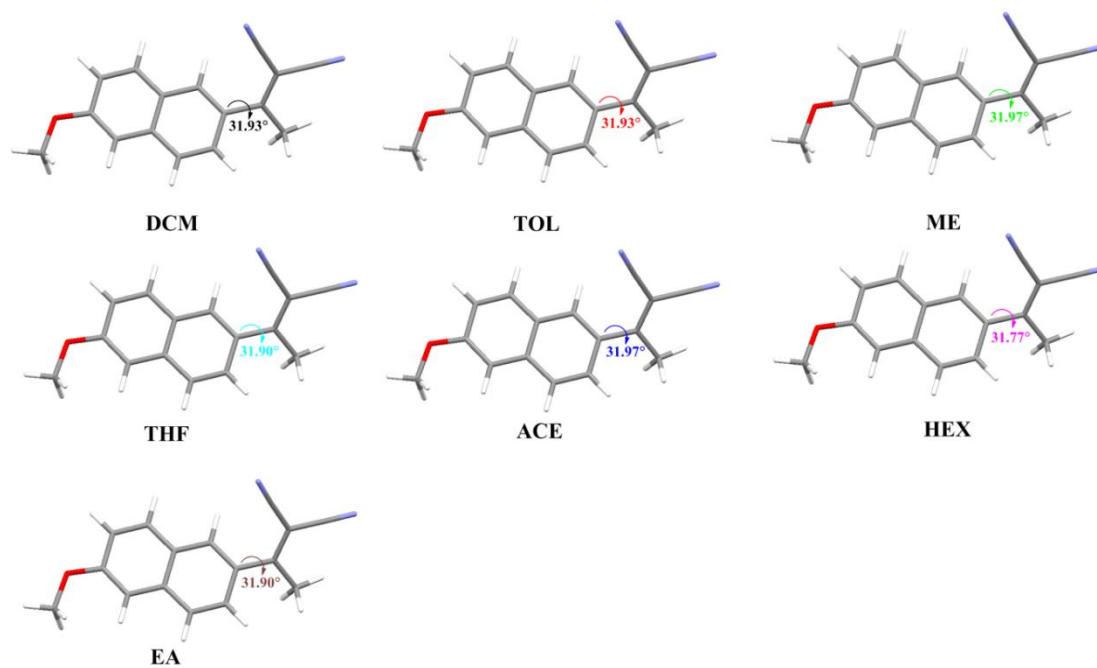

**Fig.S5** The selected dihedral angles ( $\theta/^\circ$ ) in optimized structures of excitation state (S1) of **MNM**

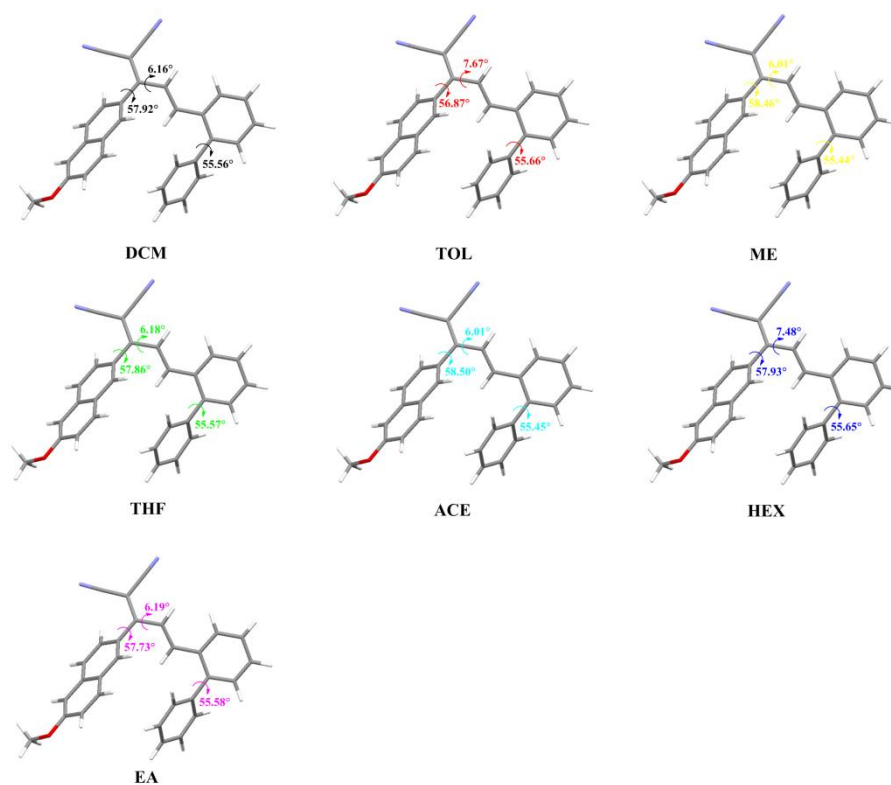

**Fig.S6** The selected dihedral angles ( $\theta/^\circ$ ) in optimized structures of ground state (S0) of ***o*-BMNM**

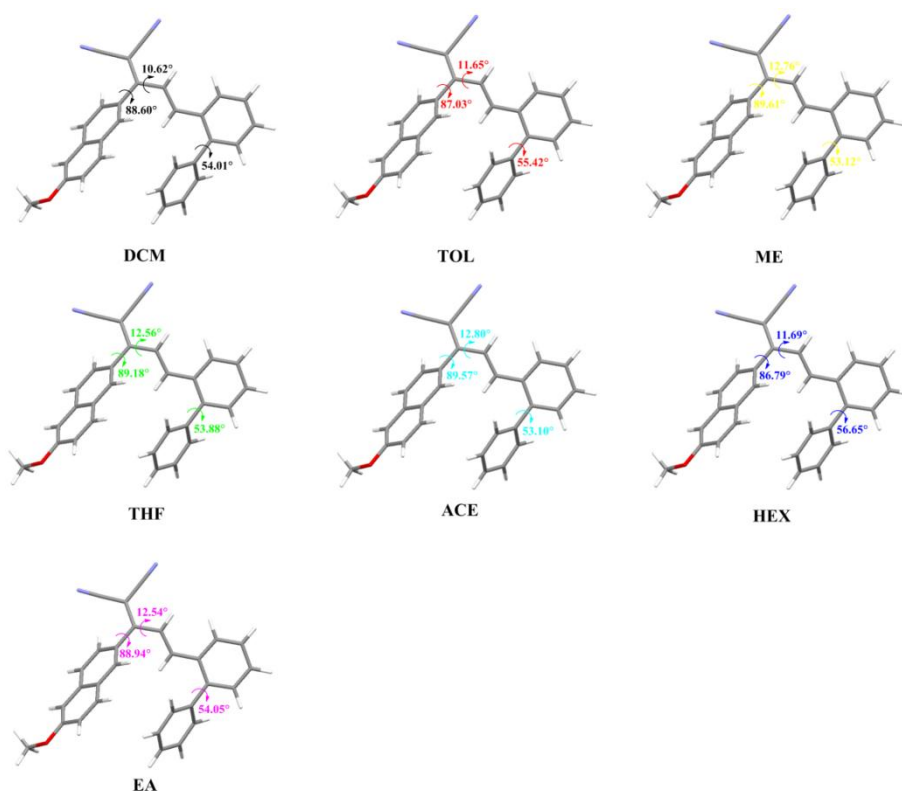

**Fig.S7** The selected dihedral angles ( $\theta/^\circ$ ) in optimized structures of excitation state (S1) of *o*-BMNM.

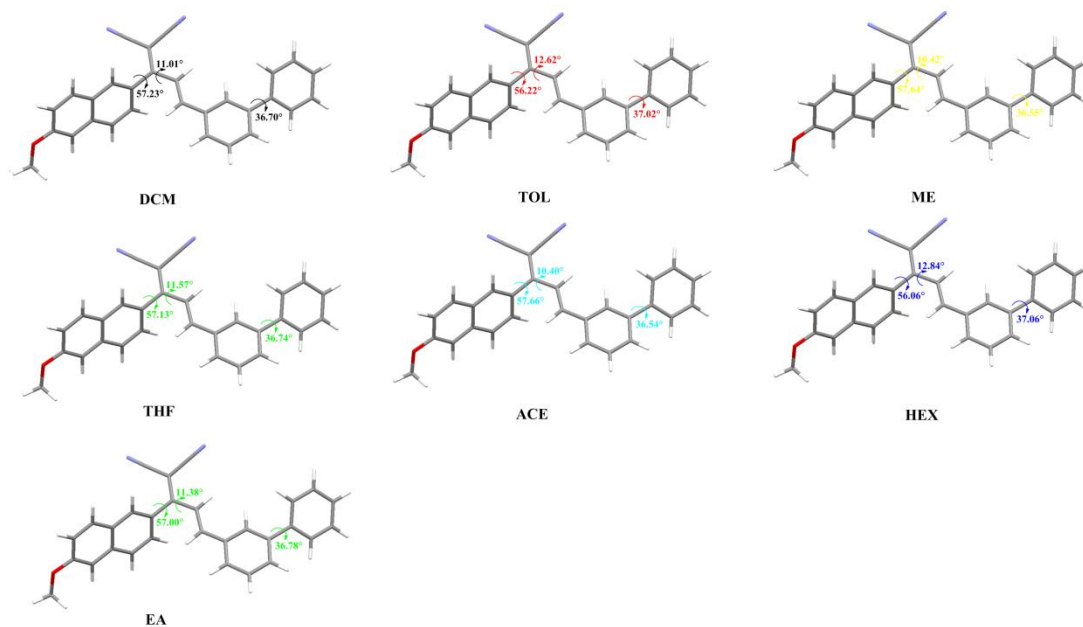

**Fig.S8** The selected dihedral angles ( $\theta/^\circ$ ) in optimized structures of ground state (S0) of *m*-BMNM.

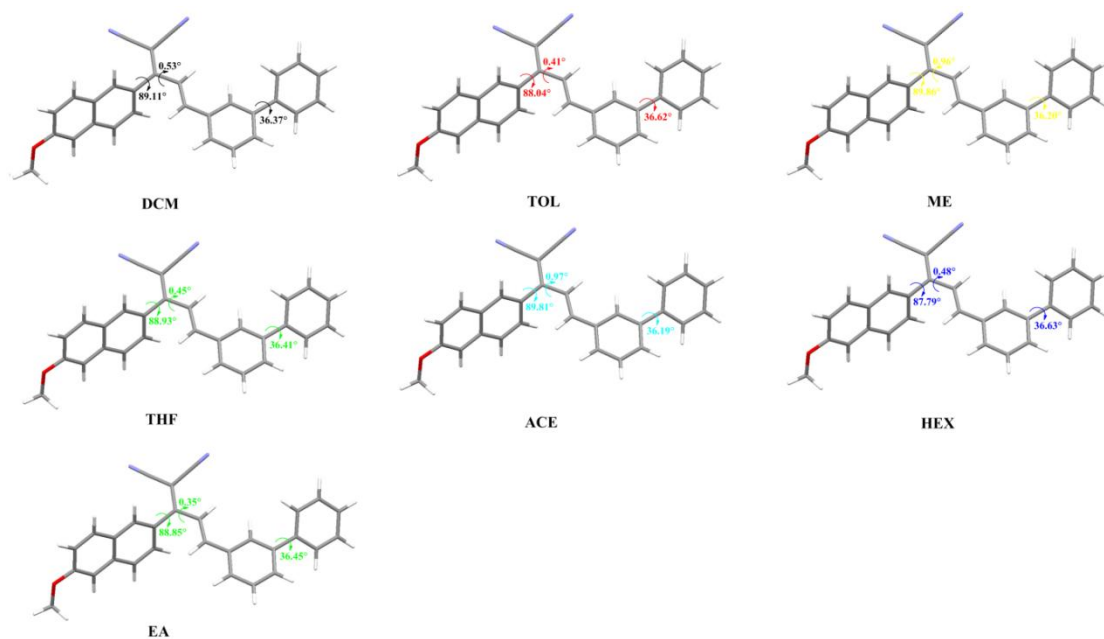

**Fig.S9** The selected dihedral angles ( $\theta/^\circ$ ) in optimized structures of excitation state (S1) of *m*-BMNM.

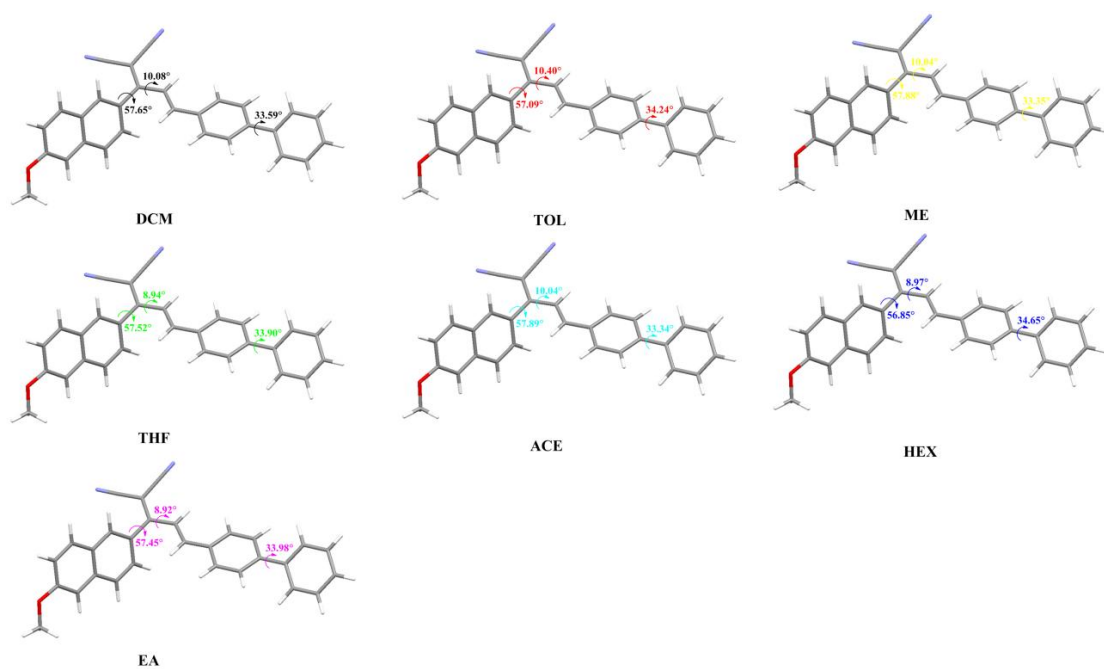

**Fig.S10** The selected dihedral angles ( $\theta/^\circ$ ) in optimized structures of ground state (S0) of *p*-BMNM.



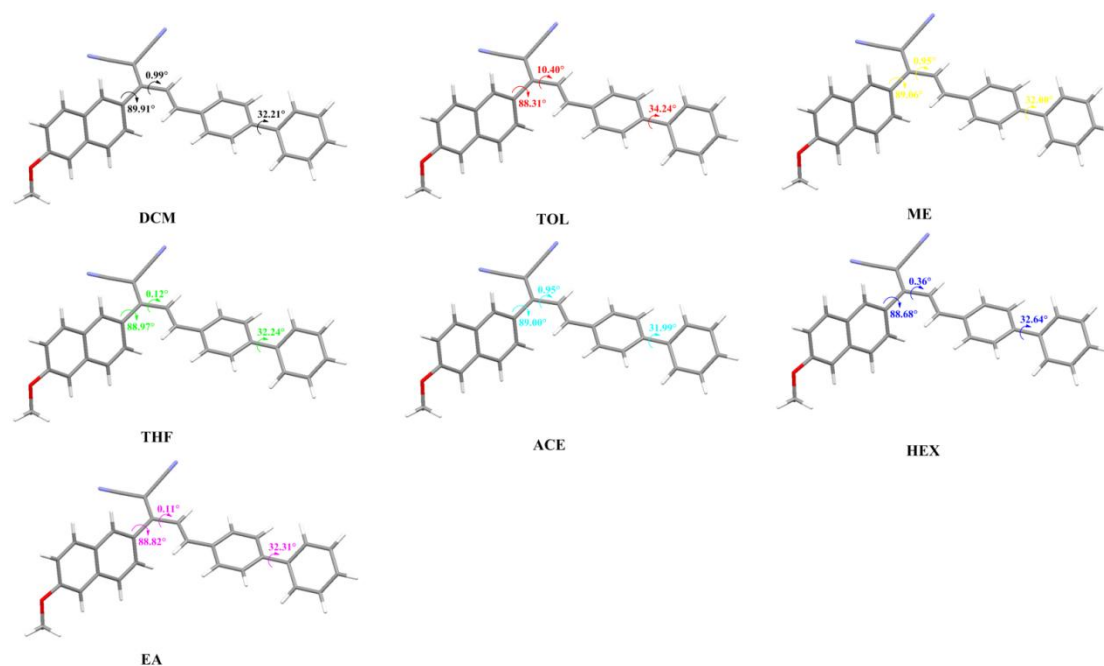

**Fig.S11** The selected dihedral angles ( $\theta/^\circ$ ) in optimized structures of excitation state (S1) of *p*-BMNM.

## Experimental Section

All reagents were purchased from Aldrich and Acros without further purification. The three isomers in this study were synthesized by the condensation reaction and Knoevenagel reaction in a respectable yield. The  $^1\text{H}$  NMR and  $^{13}\text{C}$  NMR spectra of four compounds were recorded at 303K on a Bruker Avance NMR spectrometer using  $\text{CDCl}_3$  as solvent and TMS as an internal reference. The two fluorescent isomers were characterized by a Flash EA 1112, CHNS-O elemental analysis instrument.

## Synthesis

of

### 2-(1-(6-methoxynaphthalen-2-yl)-ethylidene)malononitrile (MNM)

Initially, 2-acetyl-6-methoxynaphthalene 1 (2.35 g, 11.75 mmol) and malononitrile (1.16 g, 17.625 mmol) were dissolved in mixture of dichloromethane (20 mL) and methanol (10 mL), and then ammonium acetate (1.36 g, 17.625 mmol) was added into the reaction mixture. The mixture was stirred at 40°C for 6 hours. After cooling to room temperature, the solvent was removed under vacuum and subsequently separated with chromatography on silical gel (ethyl acetate/petroleum ether = 5/1) to give rise to **MNM** as a yellow solid (2.1g, 80%). Anal. Calcd. (%) : C, 77.40; H, 4.87; N, 11.28. Found: C, 77.38; H, 4.82; N, 11.33. <sup>1</sup>H NMR 8.07 (d, *J* = 1.7 Hz, 1H, Ar), 7.85 (d, *J* = 8.8 Hz, 2H, Ar), 7.63 (dd, *J* = 8.6, 2.0 Hz, 1H, Ar), 7.26 (dd, *J* = 9.0, 2.5 Hz, 1H, Ar), 7.19 (d, *J* = 2.4 Hz, 1H, Ar), 3.98 (s, 3H, OCH<sub>3</sub>), 2.75 (s, 3H, CH<sub>3</sub>). (Fig. S12). <sup>13</sup>C NMR (300 MHz, CDCl<sub>3</sub>):174.942, 159.993, 136.583, 130.747, 128.495, 127.853, 127.700, 124.250, 120.465, 113.431, 105.745, 83.303, 77.352, 77.237, 77.036, 76.719, 55.522 ppm (Fig. S13). IR (KBr pellet, cm<sup>-1</sup>): 3331, 3275, 2488, 1655, 1448, 1404, 1311, 1244, 1134, 1041, 972, 941, 885, 829, 771, 738, 690, 578, 532, 410, 399. (Fig. S14).

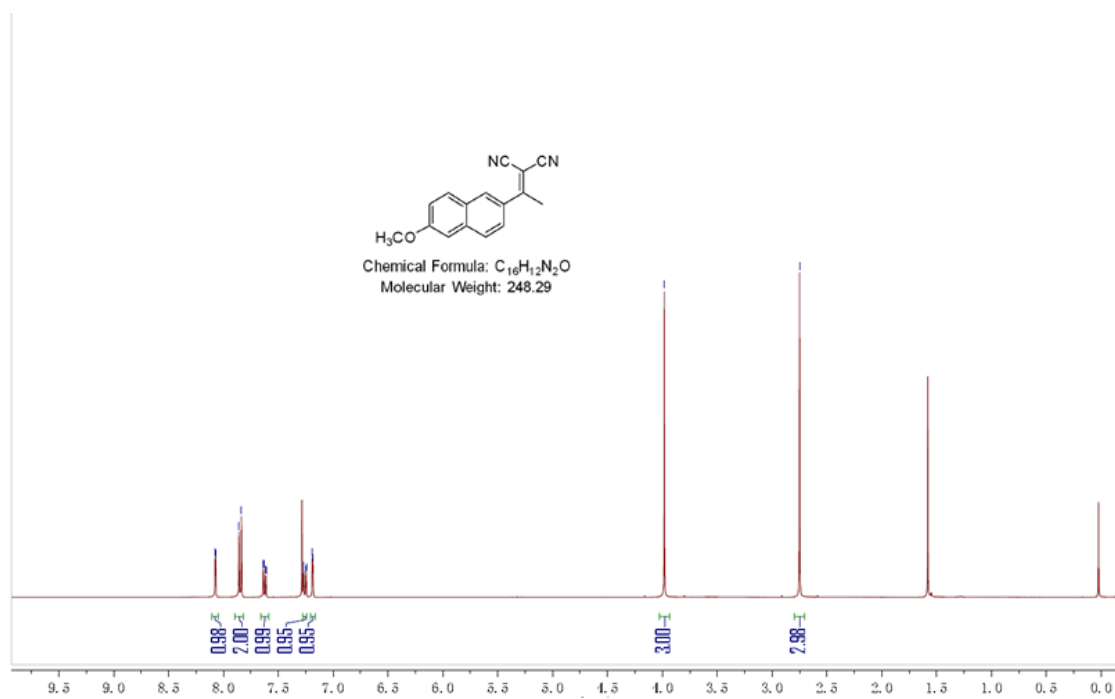

**Fig. S12** The <sup>1</sup>H-NMR spectra of MNM

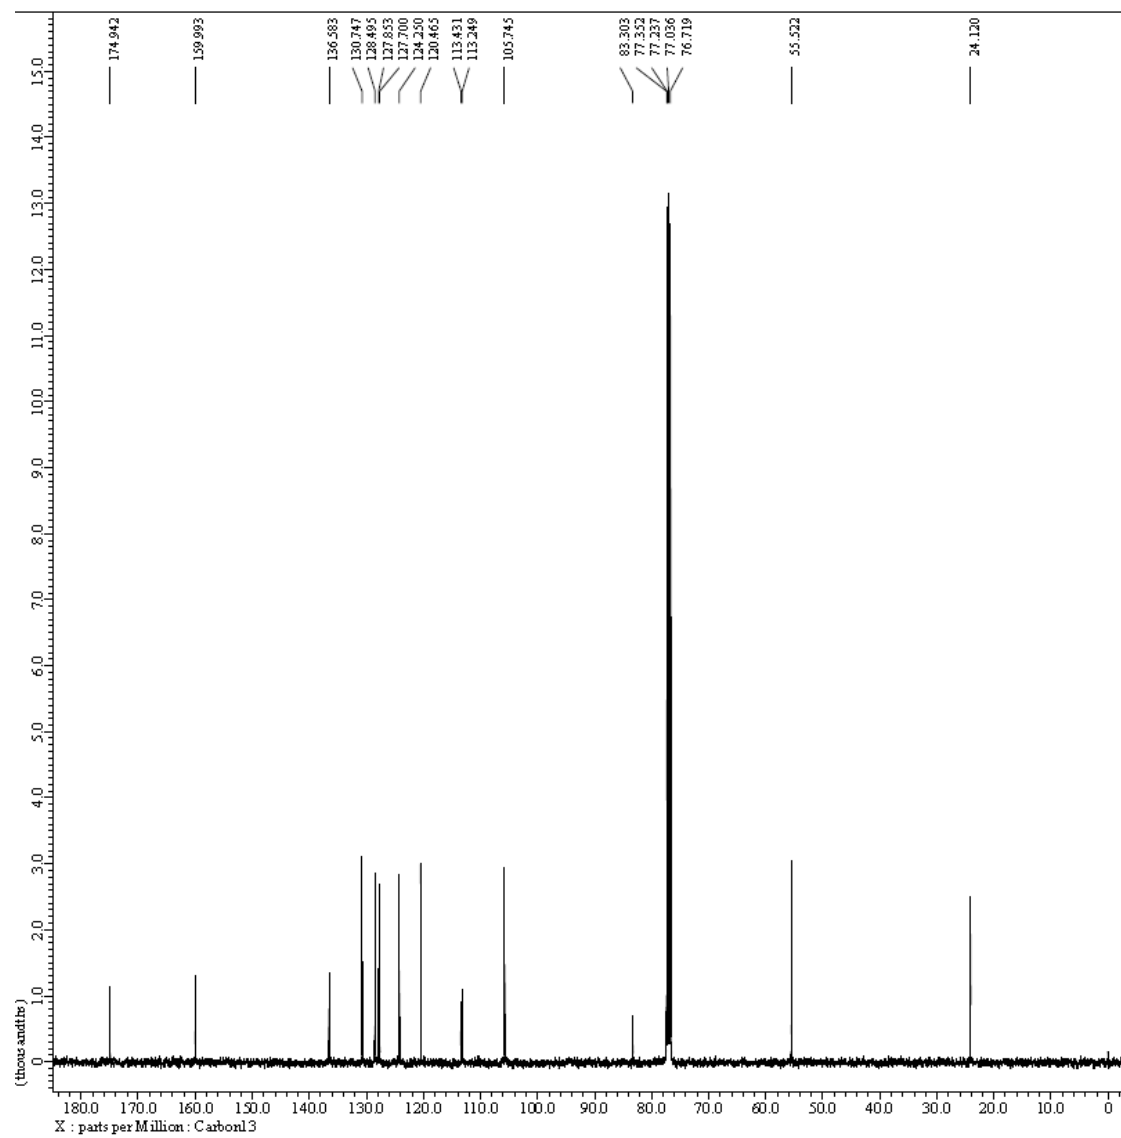

**Fig. S13** The  $^{13}\text{C}$ -NMR spectra of MNM

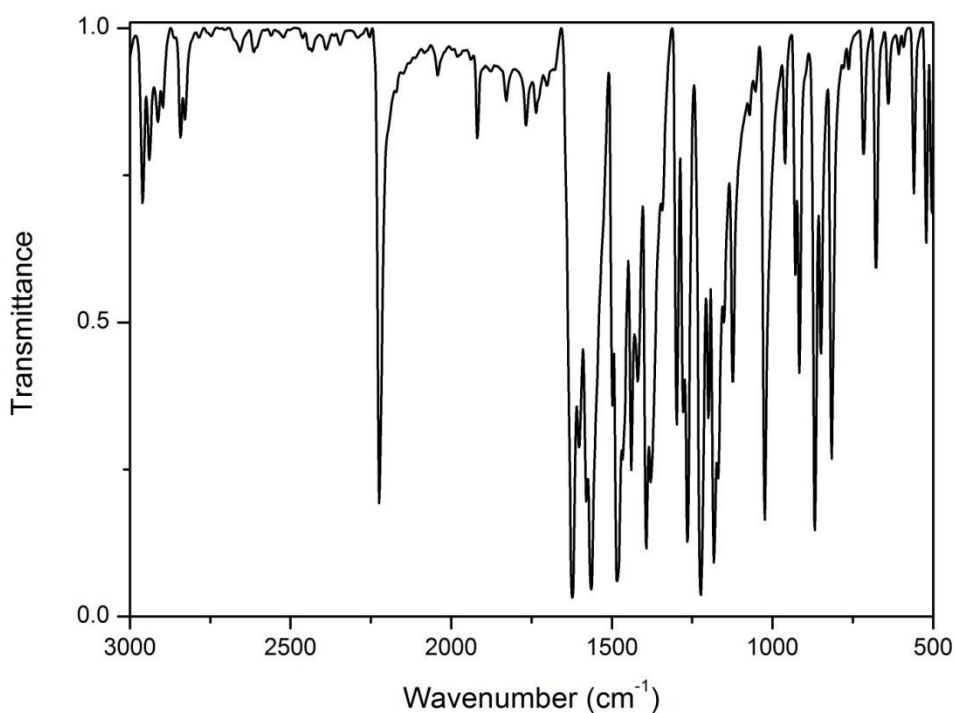

**Fig. S14** The IR spectra of **MNM**

## Synthesis

of

### **(E)-2-(3-([1,1'-biphenyl]-4-yl)-1-(6-methoxynaphthalen-2-yl)allylidene)malononitrile (*p*-BMNM)**

Compound **MNM** (0.23 g, 0.92 mmol) and biphenyl-4-carboxaldehyde (0.17 g, 0.92 mmol) were stirred in 2-propanol (20 mL). Then, a catalytic amount of piperidine was added to the mixture. The mixture was stirred at 70°C for 3 hours. The mixture was cooled to room temperature, and the solution was filtered to obtain a yellow solid. The solid was subsequently separated with chromatography on silical gel (dichloromethane/methanol = 4/1) to give pure ***p*-BMNM** as a yellow solid. Yield: 0.31g (81%). Anal. Calcd. (%) : C, 84.44; H, 4.89; N, 6.79. Found: C, 84.47; H, 4.82; N, 6.74. <sup>1</sup>H NMR (300 MHz, CDCl<sub>3</sub>): δ 7.96-7.82 (m, 3H, Ar), 7.72 (d, *J* = 15.5 Hz, 1H, Ar), 7.69-7.59 (m, 6H, Ar), 7.48 (qd, *J* = 8.5, 7.8, 1.8 Hz, 3H, Ar), 7.44-7.39 (m, 1H, Ar), 7.30 (d,

$J = 2.5$  Hz, 1H, CH=CH), 7.25 (d,  $J = 2.4$  Hz, 1H, CH=CH), 7.01 (d,  $J = 15.6$  Hz, 1H, Ar), 4.01 (s, 3H, O CH<sub>3</sub>) (Fig. S15). <sup>13</sup>C NMR (300 MHz, CDCl<sub>3</sub>):  $\delta$  171.311, 159.457, 148.829, 144.354, 139.659, 133.325, 130.306, 129.376, 129.348, 128.993, 128.255, 128.140, 128.083, 127.767, 127.623, 127.067, 126.243, 124.623, 120.302, 113.824, 113.201, 105.774, 81.702, 77.630, 77.333, 77.218, 77.016, 76.700, 55.522 ppm (Fig. S16). IR (KBr pellet, cm<sup>-1</sup>): 2214, 1593, 1487, 1388, 1344, 1307, 1263, 1218, 1193, 1176, 1026, 985, 912, 854, 759, 686 (Fig. S17).

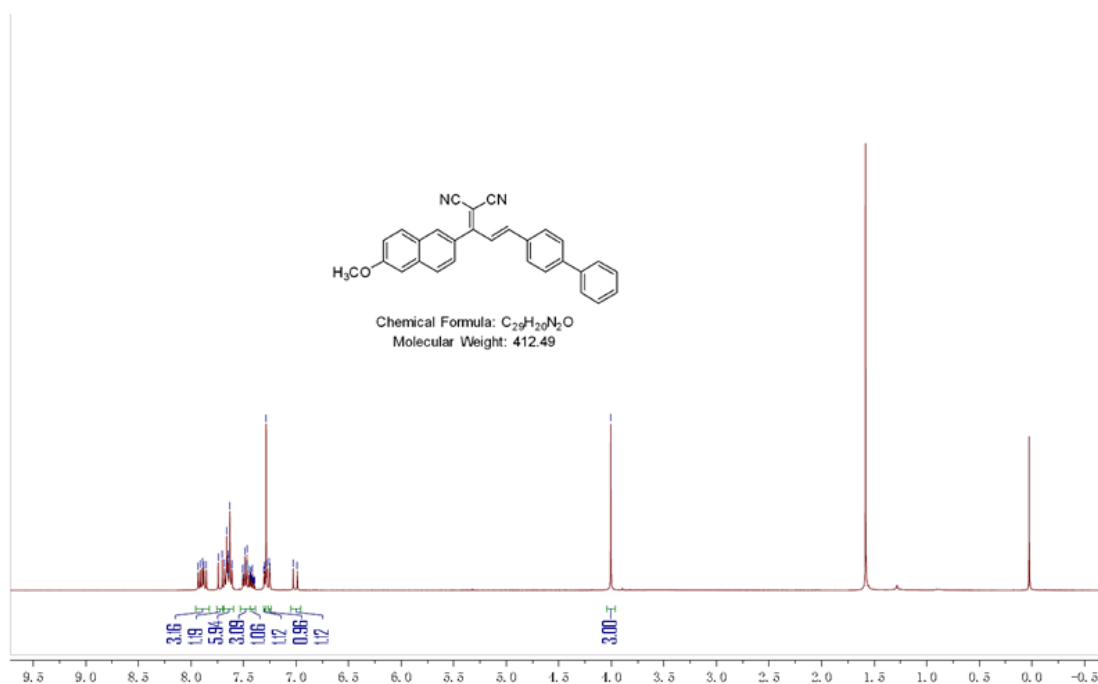

**Fig. S15** The <sup>1</sup>H-NMR spectra of *p*-BMNM

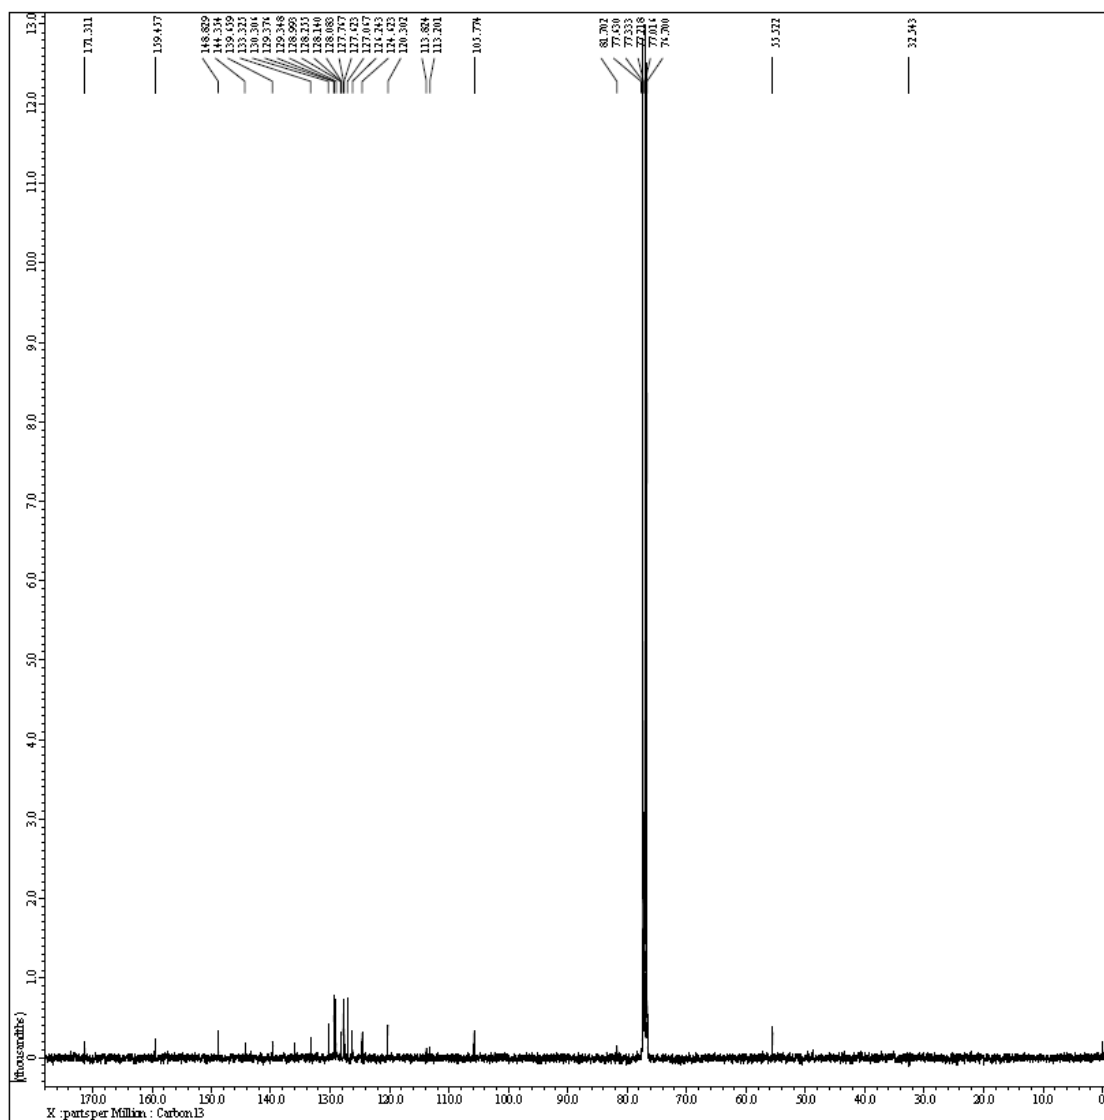

**Fig. S16** The  $^{13}\text{C}$ -NMR spectra of *p*-BMNM

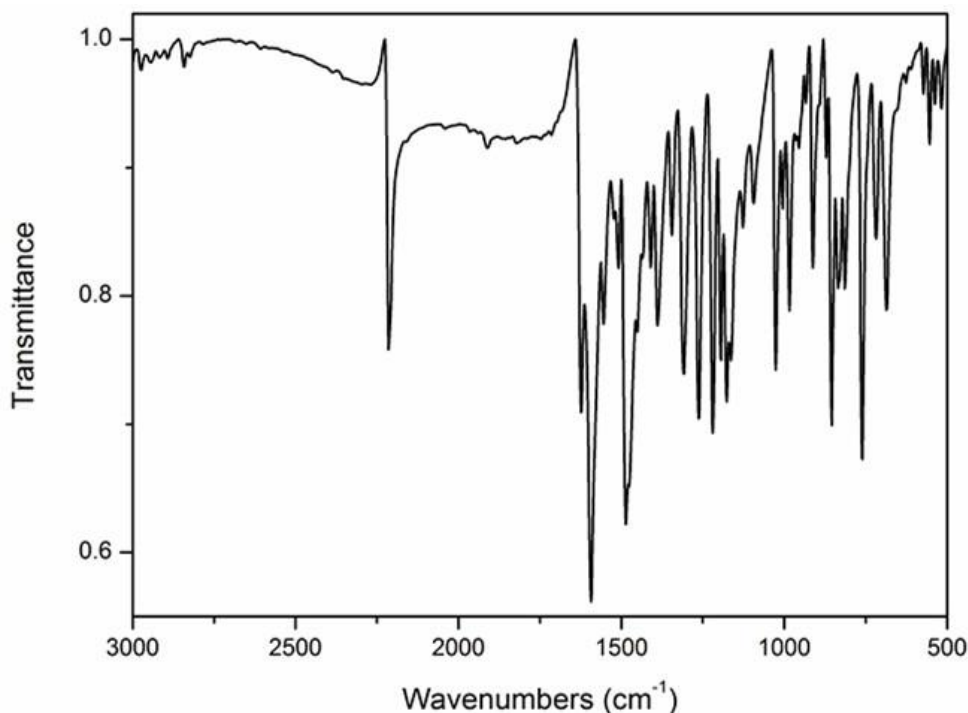

**Fig. S17** The IR spectra of *p*-BMNM

**Synthesis** **of**  
**(E)-2-(3-([1,1'-biphenyl]-2-yl)-1-(6-methoxynaphthalen-2-yl)allylidene)**  
**malononitrile (*o*-BMNM)**

This compound was synthesized by the same procedure as described for *p*-BMNM except that biphenyl-2-carboxaldehyde was used instead of biphenyl-4-carboxaldehyde. Anal. Calcd. (%) : C, 84.44; H, 4.89; N, 6.79. Found: C, 84.43; H, 4.90; N, 6.78. <sup>1</sup>H NMR (300 MHz, CDCl<sub>3</sub>): δ 7.88-7.84 (m, 1H, Ar), 7.73-7.66 (m, 3H, Ar), 7.58 (d, *J* = 15.7 Hz, 1H, CH=CH), 7.51-7.43 (m, 2H, Ar), 7.37-7.33 (m, 1H, Ar), 7.29-7.26 (m, 1H, Ar), 7.24-7.15 (m, 4H, Ar), 7.15-7.10 (m, 3H, Ar), 7.03 (d, *J* = 15.7 Hz, 1H, CH=CH), 3.95 (s, 3H, OCH<sub>3</sub>) (Fig. S18). <sup>13</sup>C NMR (300 MHz, CDCl<sub>3</sub>): δ 171.608, 159.255, 148.906, 131.034, 130.565, 130.229, 129.549, 129.099, 128.083, 127.805, 127.556, 127.393, 127.010, 125.917, 125.266, 119.947, 113.805, 113.153, 105.630, 81.616, 77.342, 77.227, 77.026, 76.700, 55.455 ppm (Fig. S19). IR (KBr pellet, cm<sup>-1</sup>): 2246, 1613,



1595, 1579, 1563, 1548, 1502, 1491, 1460, 1443, 1425, 1402, 1380, 1355, 1326, 1291, 1237, 1188, 1170, 1143, 1116, 1098, 1049, 932, 892, 832, 793, 727, 714, 684 (Fig. S20).

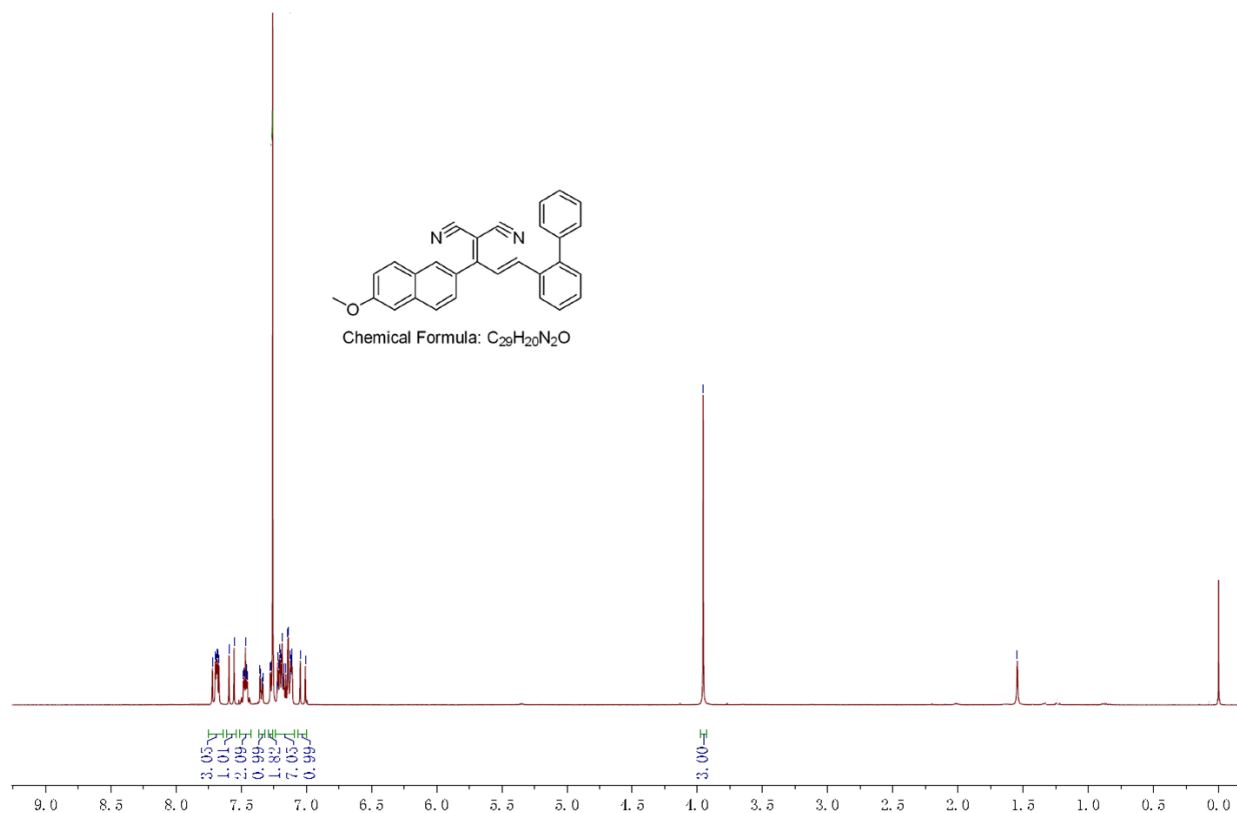

**Fig. S18** The <sup>1</sup>H-NMR spectra of *o*-BMNM

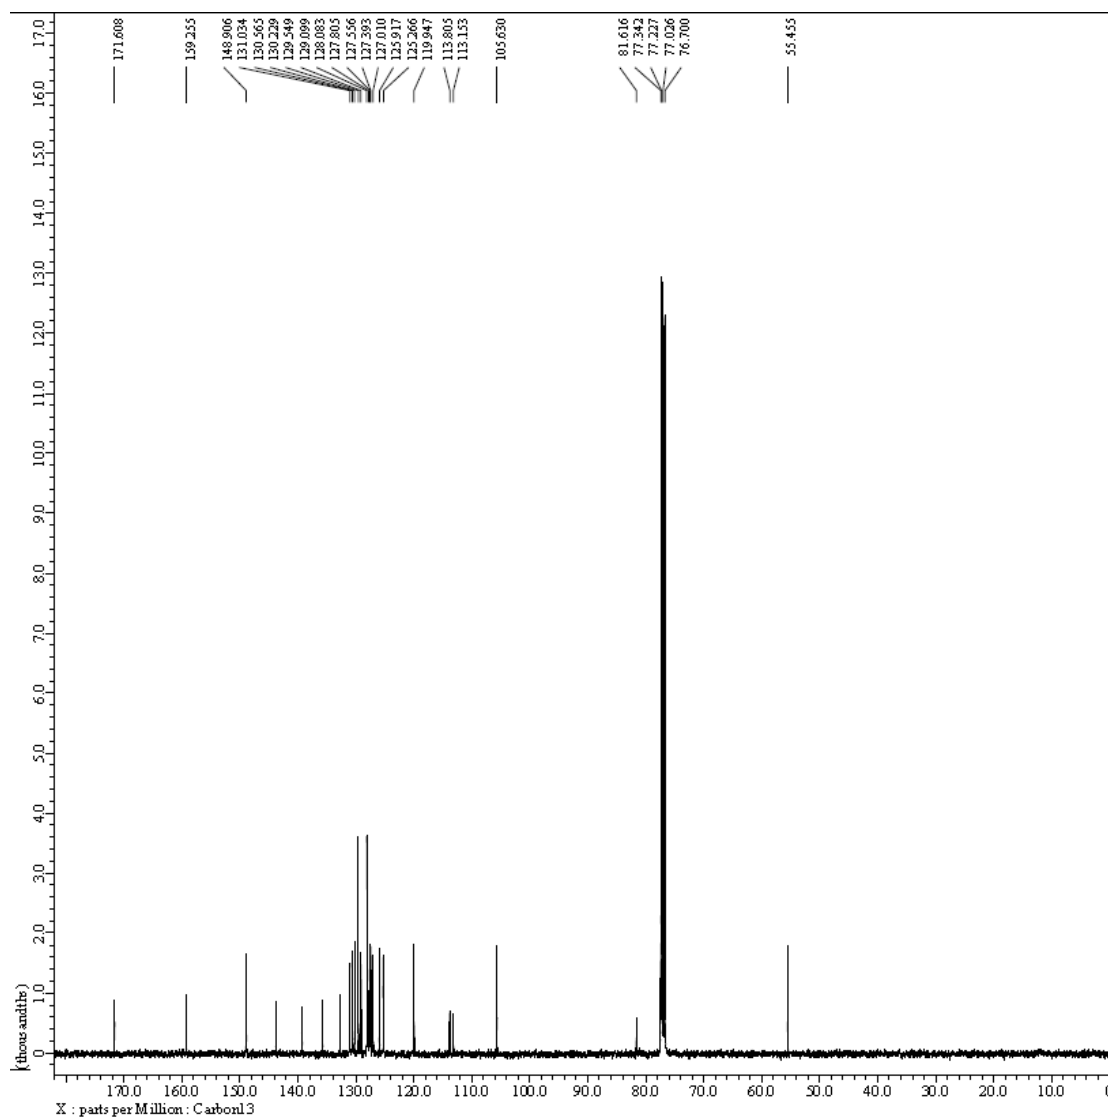

**Fig. S19** The  $^{13}\text{C}$ -NMR spectra of *o*-BMNM

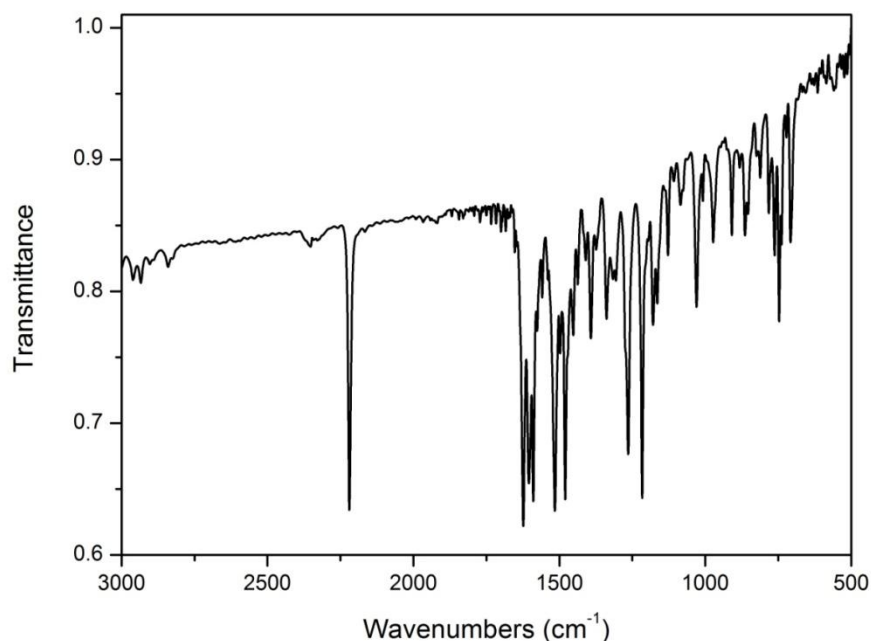

**Fig. S20** The IR spectra of *o*-BMNM

**Synthesis** **of**  
**(E)-2-(3-([1,1'-biphenyl]-3-yl)-1-(6-methoxynaphthalen-2-yl)allylidene)**  
**malononitrile (*m*-BMNM)**

This compound was synthesized by the same procedure as described for *p*-BMNM except that biphenyl-3-carboxaldehyde was used instead of biphenyl-4-carboxaldehyde. Anal. Calcd. (%) : C, 84.44; H, 4.89; N, 6.79. Found: C, 84.46; H, 4.91; N, 6.76. <sup>1</sup>H NMR (300 MHz, CDCl<sub>3</sub>): δ 7.90 (d, *J* = 8.7 Hz, 1H, Ar), 7.87 (d, *J* = 2.2 Hz, 1H, Ar), 7.84 (d, *J* = 9.3 Hz, 1H, Ar), 7.72 (d, *J* = 15.5 Hz, 1H, CH=CH), 7.68-7.63 (m, 2H, Ar), 7.58-7.52 (m, 3H, Ar), 7.50 (d, *J* = 8.0 Hz, 1H, Ar), 7.47-7.43 (m, 2H, Ar), 7.43-7.41 (m, 1H, Ar), 7.40-7.34 (m, 1H, Ar), 7.29-7.25 (m, 1H, Ar), 7.22 (d, *J* = 2.6 Hz, 1H, Ar), 7.01 (d, *J* = 15.7 Hz, 1H, CH=CH), 3.98 (s, 3H, OCH<sub>3</sub>) (Fig. S21). <sup>13</sup>C NMR (300 MHz, CDCl<sub>3</sub>): δ 171.330, 159.485, 149.318, 130.316, 129.654, 129.405, 128.945, 127.910, 127.862, 127.652,

127.105, 126.214, 120.321, 113.728, 113.095, 105.774, 82.105, 77.342, 77.227, 77.016, 76.700, 55.522 ppm (Fig. S22). IR (KBr pellet,  $\text{cm}^{-1}$ ): 2280, 1618, 1587, 1564, 1548, 1508, 1488, 1469, 1442, 1428, 1401, 1356, 1205, 1172, 1140, 1115, 1060, 1009, 990, 944, 912, 880, 835, 781, 732, 716, 665, 640 (Fig. S23).

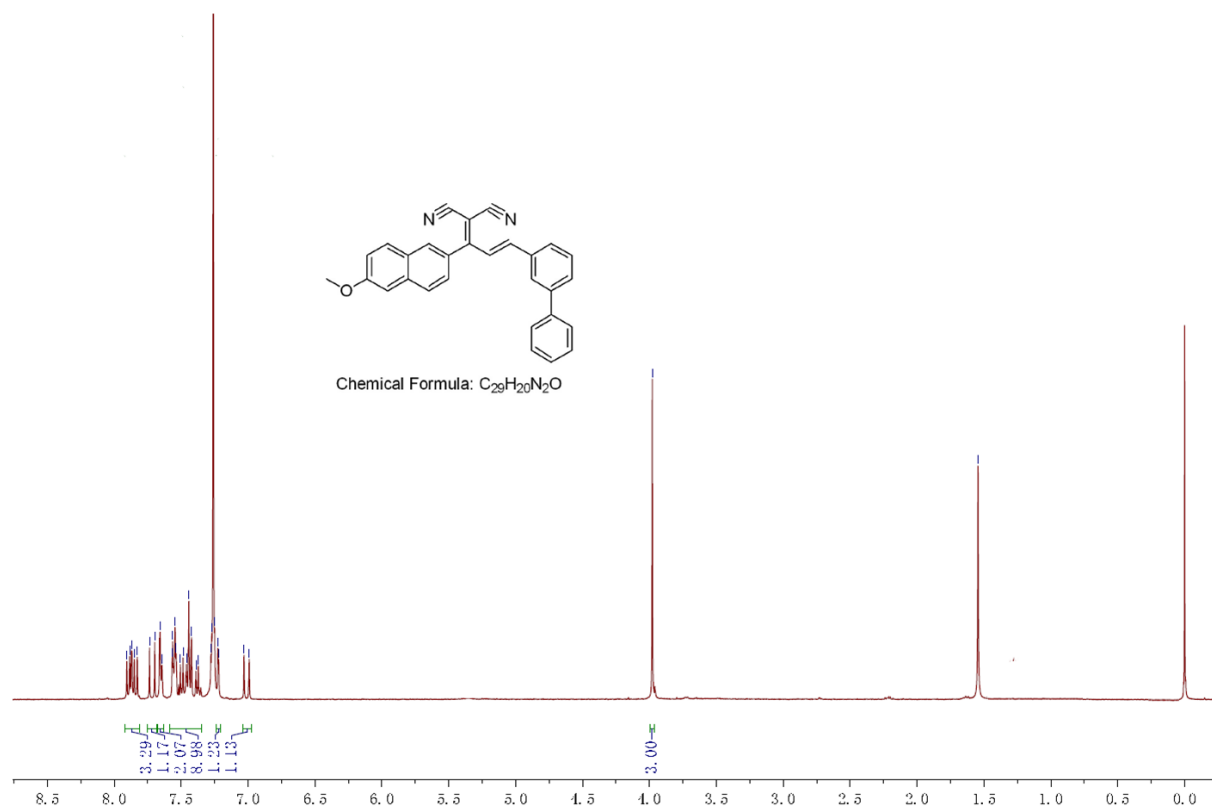

**Fig. S21** The  $^1\text{H-NMR}$  spectra of *m*-BMNM

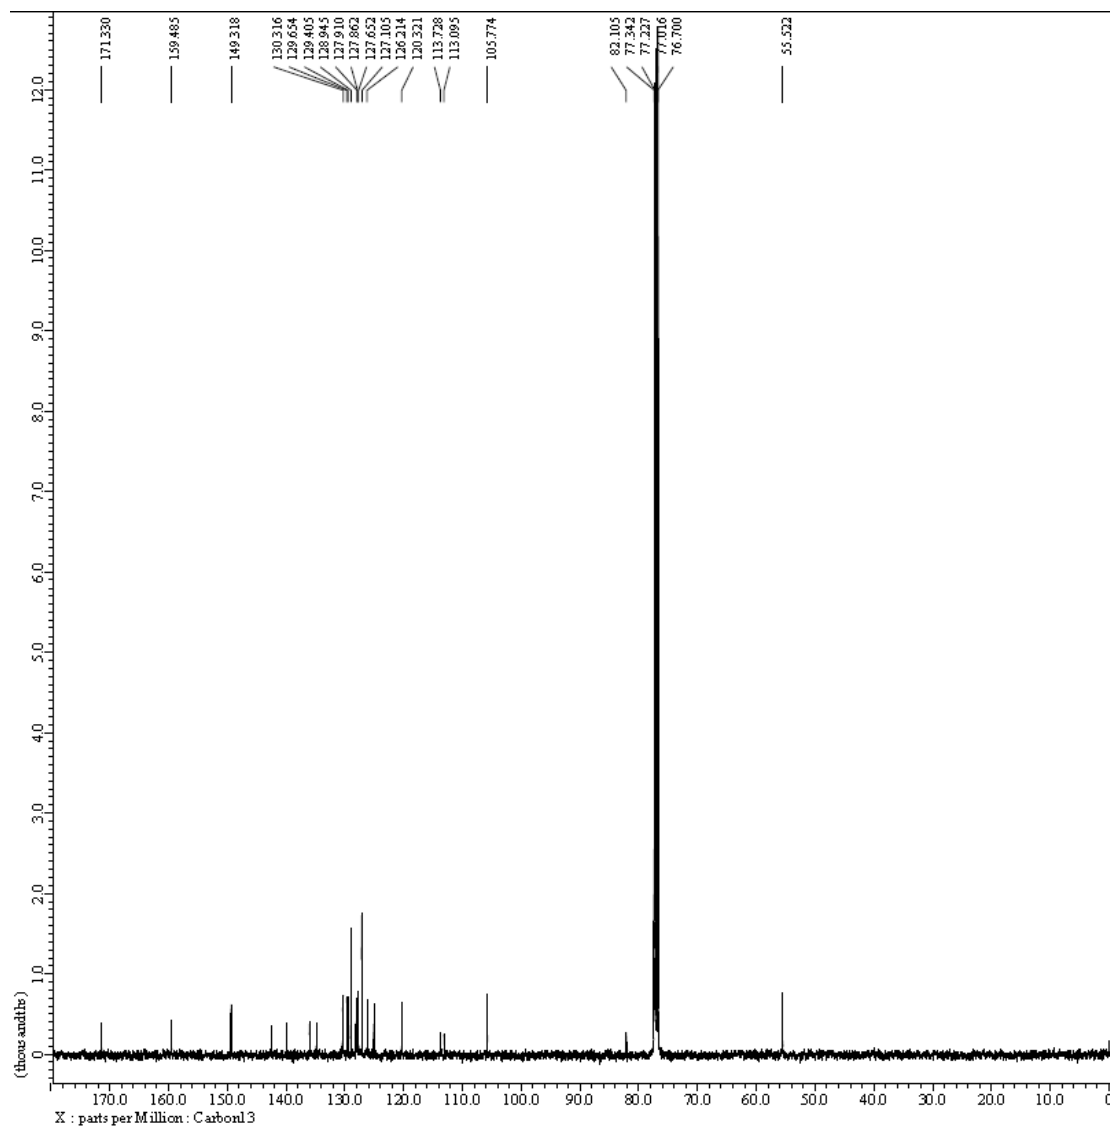

**Fig. S22** The  $^{13}\text{C}$ -NMR spectra of *m*-BMNM

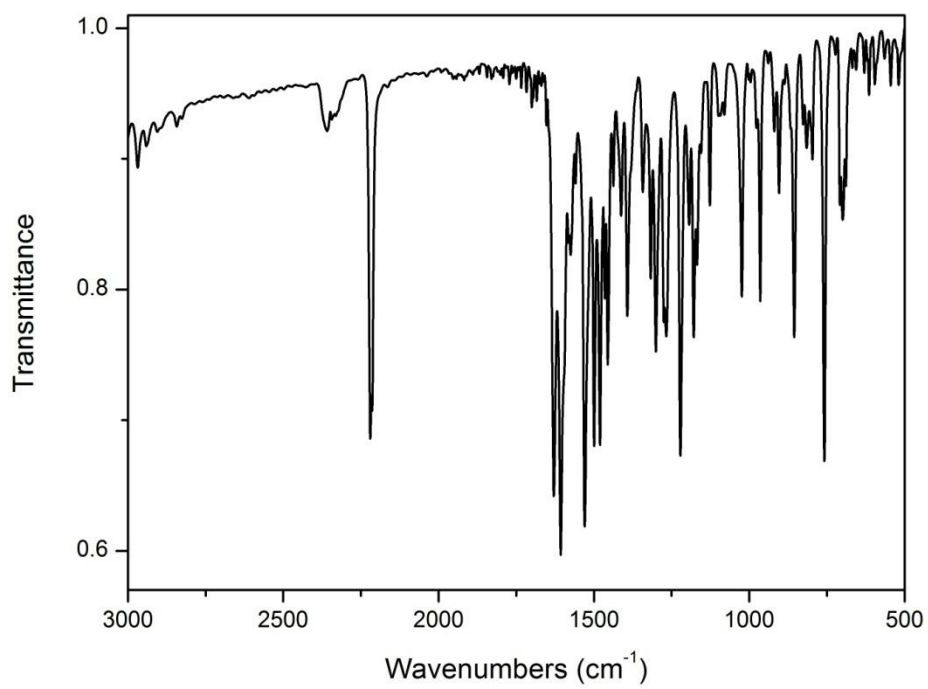

**Fig. S23** The IR spectra of *m*-BMNM
